# Supplementary material for: A Real-World Cost-Effectiveness Analysis of Rivaroxaban versus Vitamin K Antagonists for the Treatment of Symptomatic Venous Thromboembolism: Lessons from the REMOTEV Registry
Source: MDPI journal article supplement (doi:10.3390/medicina59010181), 2023-01-16
Supplement: s1 [file s1]

**Table S1.** Unit costs of resources use in euros.

|                                                      |                                |                | Unit Cost |
|------------------------------------------------------|--------------------------------|----------------|-----------|
| Direct healthcare costs (national estimates)         |                                |                |           |
|                                                      | Biology                        |                | €1.89     |
|                                                      | Creatinine                     |                | €2.43     |
|                                                      | Aminotransferases              |                | €4.05     |
|                                                      | Platelet count                 |                | €5.4      |
|                                                      | International Normalized Ratio |                |           |
|                                                      | Medics                         |                | €58.25    |
| Rivaroxaban (30 tabs)                                |                                | VKAs (30 tabs) | €3.93     |
|                                                      | Low Molecular Weight Heparin   |                | €5.7      |
|                                                      | Fondaparinux                   |                | €5.1      |
|                                                      | Nurses                         |                |           |
| Anticoagulant injection                              |                                | Blood test     | €7        |
|                                                      |                                |                | €8.58     |
| Hospital admissions (French diagnosis related group) |                                |                |           |
|                                                      | Pulmonary embolism             |                | €4705     |
|                                                      | Deep vein thrombosis           |                | €2494     |
|                                                      | Peripheral vascular disorder   |                | €2855     |

Tabs: tablets; VKAs: vitamin K antagonists.

Weighted average for all four severity levels
